# Supplementary material for: Genotype-Specific Antioxidant Responses and Assessment of Resistance Against Sclerotinia sclerotiorum Causing Sclerotinia Rot in Indian Mustard
Source: MDPI journal article supplement (doi:10.3390/pathogens9110892), 2020-10-27
Supplement: s1 [file s1]

Supplementary table 1: Data on weather-related parameters *viz.* temperature, relative humidity and rainfall from the date of inoculation (20<sup>th</sup> January 2020) to date of last observation (06<sup>th</sup> February 2020).

| Date & month              | Temperature (° C) |            |            | Relative humidity (%) |         |         | Rainfall (mm) |
|---------------------------|-------------------|------------|------------|-----------------------|---------|---------|---------------|
|                           | Maximum           | Minimum    | Average    | Morning               | Evening | Average |               |
| 20 <sup>th</sup> January  | 9.6               | 6.0        | 7.8        | 100                   | 86      | 93      | 0.0*          |
| 21 <sup>th</sup> January  | 13.5              | 6.0        | 9.8        | 100                   | 79      | 89      | 0.0           |
| 22 <sup>th</sup> January  | 15.9              | 4.5        | 10.2       | 100                   | 59      | 79      | 0.0           |
| 23 <sup>th</sup> January  | 19.0              | 3.0        | 11.0       | 100                   | 48      | 74      | 0.0           |
| 24 <sup>th</sup> January  | 19.3              | 3.0        | 11.2       | 100                   | 47      | 73      | 0.0           |
| 25 <sup>th</sup> January  | 19.4              | 2.4        | 10.9       | 100                   | 40      | 70      | 0.0           |
| 26 <sup>th</sup> January  | 21.2              | 4.0        | 12.6       | 97                    | 46      | 71      | 0.0           |
| 27 <sup>th</sup> January  | 21.4              | 6.9        | 14.2       | 88                    | 74      | 81      | 0.0           |
| 28 <sup>th</sup> January  | 17.9              | 11.4       | 14.7       | 91                    | 79      | 85      | 7.2           |
| 29 <sup>th</sup> January  | 19.0              | 6.0        | 12.5       | 100                   | 65      | 83      | 0.0           |
| 30 <sup>th</sup> January  | 19.0              | 4.0        | 11.5       | 100                   | 58      | 79      | 0.0           |
| 31 <sup>th</sup> January  | 18.0              | 2.5        | 10.3       | 100                   | 70      | 85      | 0.0           |
| 01 <sup>th</sup> February | 17.2              | 2.9        | 10.1       | 100                   | 67      | 84      | 0.0           |
| 02 <sup>th</sup> February | 19.0              | 3.5        | 11.3       | 100                   | 59      | 79      | 0.0           |
| 03 <sup>th</sup> February | 18.5              | 2.1        | 10.3       | 100                   | 44      | 72      | 0.0           |
| 04 <sup>th</sup> February | 20.9              | 6.1        | 13.5       | 86                    | 63      | 75      | 0.0           |
| 05 <sup>th</sup> February | 20.4              | 3.2        | 11.8       | 100                   | 55      | 77      | 0.0           |
| 06 <sup>th</sup> February | 18.4              | 1.9        | 10.2       | 100                   | 48      | 74      | 0.0           |
| Range                     | 9.6 - 21.4        | 1.9 - 11.4 | 7.8 - 14.7 | 86 - 100              | 40 - 86 | 70 - 93 | 0.0 - 7.2     |
| Mean                      | 18.2              | 4.4        | 11.3       | 98                    | 60      | 79      | 0.4           |

**Location LAT: 29° 10'N LONG: 75° 46'E, ALT: 215.2m.** \*Irrigation was applied just before to artificial disease inoculation to maintain the high soil moisture and 3.2 mm rainfall was also received on 14th January.
